# Supplementary material for: G-quadruplex recognition by bis-indole carboxamides
Source: Royal Society of Chemistry journal article supplement (doi:10.1039/b806042h), 2008-01-01
Supplement: b806042h.pdf [file b806042h.pdf]

# G-quadruplex Recognition by Bis-Indole Carboxamides

*Jyotirmayee Dash, Pravin S. Shirude and Shankar Balasubramanian\**

The University Chemical Laboratory, University of Cambridge, Lensfield Road, Cambridge CB2  
1EW, UK, Fax: (+44) 1123-336-913; Tel: (+44) 1123-336347; E-mail: [sb10031@cam.ac.uk](mailto:sb10031@cam.ac.uk)

SUPPORTING INFORMATION for Chemical Communications

## Contents

|                                             |           |
|---------------------------------------------|-----------|
| <b>1.0 General conformations</b>            | <b>S2</b> |
| <b>2.0 General Methods</b>                  | <b>S3</b> |
| <b>3.0 Characterization data of ligands</b> | <b>S4</b> |
| <b>4.0 FRET</b>                             | <b>S7</b> |
| <b>5.0 CD</b>                               | <b>S8</b> |

## 1.0 Bis-indole: G-quadruplex General conformations

The bis-indole core of **1** can adopt alternative conformations due to the geometrical freedom in compound **1** (Figure 1). The strong stabilization potential of ligand **1** might be attributed due to the comparable size of (Chem 3D) bis-indole core of **1** with the G-quartet (Figure 2). The end to end total length of the central core of **1** as calculated from energy minimized Chem 3D (A) is 13.5 Å (B), which is equal to the distances of (13.6 Å) between the N<sub>9</sub> of the opposite guanine bases in the G-tetrad (C). Also the distances between other different carbons of the central core of **2** (9.3-12.8 Å) is similar to the distances (10.63-12.06 Å) between the two hydrogen atoms of the non-hydrogen-bonding G-NH<sub>2</sub> functional group of the opposite guanine bases in the G-tetrad.

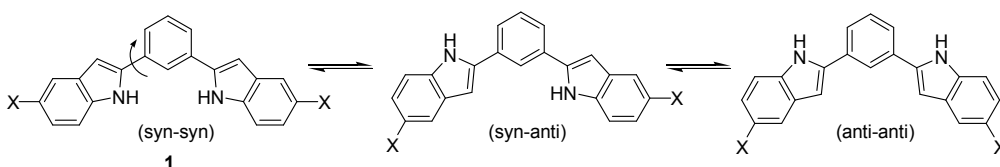

**Figure 1:** Different conformations of bis-indole core separated by a central benzene ring

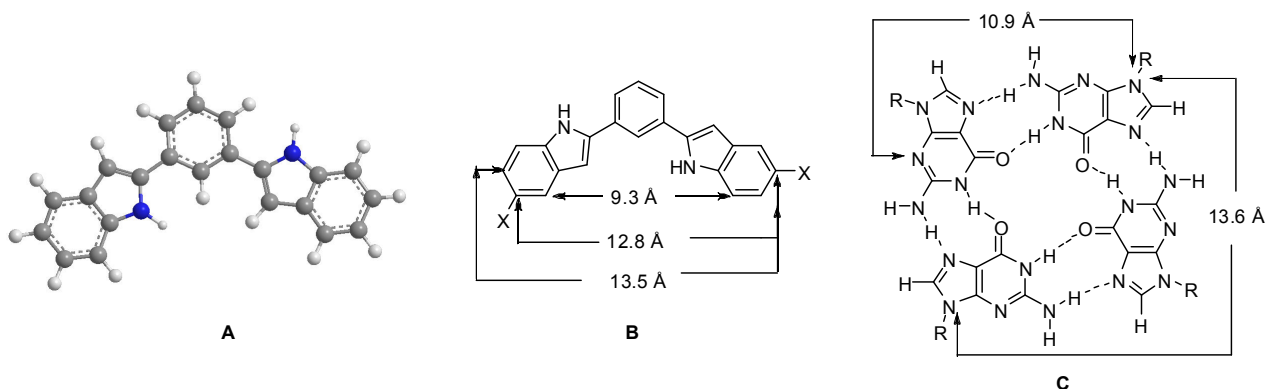

**Figure 2.** Energy minimized (Chem 3D Ultra 10.0, CambridgeSoft Corp., MA) of bis-indole core of **1** (A); Selected dimensions of A (B); dimensions of a G-quartet from X-ray structure.<sup>[1]</sup>

## 2.0 General Methods

NMR spectra were acquired on Bruker DRX-500 instruments. Chemical shifts were relative to the deuterated solvent peak and are reported in parts per million (ppm).  $^1\text{H}$  NMR spectra were recorded at 500 MHz in  $\text{CD}_3\text{CN}$  and data were reported as follows: chemical shift in parts per million from tetramethylsilane as an internal standard, multiplicity (s=singlet, d=doublet, t=triplet, q=quartet, m=multiplet or overlap of nonequivalent resonances), integration.  $^{13}\text{C}$  NMR spectra were recorded at 125 MHz in  $\text{CD}_3\text{CN}$  and data were reported as follows: chemical shift in parts per million from tetramethylsilane with the solvent as an internal indicator ( $\text{CDCl}_3$   $\delta$  77.0 ppm), multiplicity with respect to proton (deduced from DEPT experiments, s=quaternary C, d=CH, t= $\text{CH}_2$ , q= $\text{CH}_3$ ). The high resolution mass spectra were recorded on Micromass Q-ToF spectrometer using electrospray ionisation technique.

The compounds **1** and **2** were purified by HPLC using a Varian Pursuit C18, 5  $\mu$  column (250 $\times$  21.2 mm) and a gradient elution with water/acetonitrile 90:10 (0.1%TFA) to 50:50 in 40 min at a flow rate of 12.0 mL/min.

The ligands (**1** and **2**) solutions were prepared in MQ water, for biophysical experiments.
